# Supplementary material for: The CAMS interim Reanalysis of Carbon Monoxide, Ozone and Aerosol for 2003–2015
Source: Copernicus journal article supplement (doi:10.5194/acp-2016-666), 2016-08-26
Supplement: Supplementary file 1 [file acp-2016-666-supplement.pdf]

# 1 Supplement to

2 The CAMS interim Reanalysis of Carbon Monoxide, Ozone and Aerosol for 2003–2015 by  
3 J. Flemming, A. Benedetti, A. Inness, R. Engelen, L. Jones, V. Huijnen, S. Remy, M.  
4 Parrington, M. Suttie, A. Bozzo, V.-H. Peuch, D. Akritidis and E. Katragkou

5 Correspondence to: J. Flemming (Johannes.Flemming@ecmwf.int)

6

7

8

## 9 **1 Totals and variability of the emissions of CR and CAMSIRA**

10 In the paper, we focus on 7 regions (Europe, North America, East Asia, South America, North  
11 Africa Tropical Africa and Maritime South East Asia) as well as the tropics, the Arctic and  
12 the Antarctic. The areas are shown in Figure S1 and the coordinates of the bounding boxes are  
13 given in Table 3 of the paper. Table S1 list the annual mean, maximum and minimum  
14 emissions for different source regions for CO, NO, isoprene (C<sub>5</sub>H<sub>8</sub>) and all aerosol  
15 components (desert dust, sea salt, black carbon, organic matter and SO<sub>2</sub> tracer). An estimated  
16 linear trend, if significant with 95% confidence interval, is also listed. Time series of the  
17 anthropogenic and biomass burning emissions are shown in Figure S2.

18 The anthropogenic MACCity emissions for CO and NO decrease over Europe and North  
19 America in the range of 1 to 5% per year, whereas they increase over South East Asia by a  
20 similar amount. The global trend is almost zero for CO and slightly positive for NO.

21 The observed emissions from biomass burning as well as modelled emission of biogenic  
22 VOC, desert dust and sea salt depend strongly on the inter-annual variability of the  
23 meteorological situation but changes in land use also play a role for long term trends. Besides  
24 a large year-to-year variability, the biomass burning emissions for CO show no significant  
25 trend over the whole 2003–2015 period. However, a significant reduction occurred until 2013  
26 when global CO biomass burning emissions decreased from 423Tg in 2003 to 288 Tg in  
27 2013. The decreasing trend was most pronounced in South America (-7.5%/yr) where it  
28 occurred over the whole period.

29 The variability of biomass burning in Maritime South East Asia (MSEA) is dominated by the  
30 occurrence of El-Nino related dry conditions (Field et al., 2009), which led to extreme  
31 emissions in 2006, 2009, 2014 and most importantly in 2015. The MSEA emissions in 2015  
32 reached 140 Tg, which was about 31% (447 Tg) of the global biomass burning emissions in  
33 that year, whereas in earlier years the emissions from this region constituted 5–15% of the  
34 global value. The Indonesian fires in September and October of 2015 caused by far the  
35 highest annual wildfire emissions as well as the highest total monthly CO emissions in the  
36 whole period (Huijnen et al., 2016).

37 Tropical Africa, which consists of two distinct fire regions with different seasonality north  
38 and south of the Equator, is usually the largest source of CO biomass burning emissions  
39 because it contributes about 30% of the global value. There was little inter-annual variation in  
40 the annual emission from this region between 2003 and 2015 although a small negative, but  
41 not significant, trend was detected.

42 As the biomass burning emissions of black carbon and organic matter are mostly proportional  
43 to the CO emissions the discussion above is also valid for these aerosol species.

44 Month-specific isoprene ( $C_5H_8$ ) emissions from vegetation were only simulated for the years  
45 2003–2010 and a climatology was used for the later years (see section 2). They have  
46 decreased slightly in the 2003-2010 period, in particular in South America, where biomass  
47 burning emission decreased also significantly. The lowest global annual isoprene emissions  
48 were about 85% of the highest annual emissions in this period.

49 For methane, which also leads to CO formation during its oxidation, no emissions were used  
50 but instead surface concentrations were nudged to constrain atmospheric concentrations. An  
51 observations based trend of 1.5–3.5 ppm per year was applied to these surface concentrations  
52 and consequently the global  $CH_4$  burden increased from 4840 Tg in 2003 to 4915 Tg  
53 (0.1%/yr) in 2015.

54 The emissions of sea salt and desert dust were calculated on-line in C-IFS (Morcrette et al.,  
55 2009). The average total amount of emitted desert dust was 1489 Tg/yr, which is within the  
56 range of 1000–3000 Tg/yr given in a review by Boucher (2015). Schutgens et al. (2012)  
57 suggest larger desert dust emissions of 3244 Tg/yr using a data assimilation approach based  
58 on AERONET and MODIS observations. The median of the dust emissions for the year 2000

59 of the models compared in the AeroCom is 1640 Tg/yr (Textor et al., 2006) and they ranged  
60 between 500 and 4400 Tg/yr (Huneus et al., 2011).

61 The total annual emitted sea salt amounted to 6038 Tg/yr, which is at the upper end of the  
62 1000–6000 Tg/yr range given in Boucher (2015). The Aerocom models have a large spread of  
63 the sea salt emissions ranging from 3000 to 18000 Tg/yr with a median value of 6280 Tg/yr.  
64 More, recently Spada et al. (2013) report a range of 3888 Tg/yr to 8114 Tg/yr, when  
65 comparing different sea salt emission schemes. The observation based estimate by Schutgens  
66 et al. (2012) is 9073 Tg/yr which is the same value as the optimal estimate for seas salt with a  
67 dry diameter up to 10  $\mu\text{m}$  by Grythe et al. (2014).

68 The mainly wind driven sea salt and desert dust annual emissions in C-IFS did not have a  
69 large year-to-year differences on the global scale. However, a significant positive trend of  
70 0.4%/yr was detected in the sea salt emissions, which may require a more detailed  
71 investigation.

72 The average annual emissions of black carbon agreed well with the median value of the  
73 AeroCom models. The C-IFS emissions of organic matter and of the sulfate precursor, which  
74 includes  $\text{SO}_2$  and DMS, were about 20% higher than the respective AeroCom medians but  
75 they were both well within the range of the individual models. The black carbon emissions  
76 decreased by -0.8%/yr which is consistent with the decrease in CO biomass burning  
77 emissions.

## Area Definition

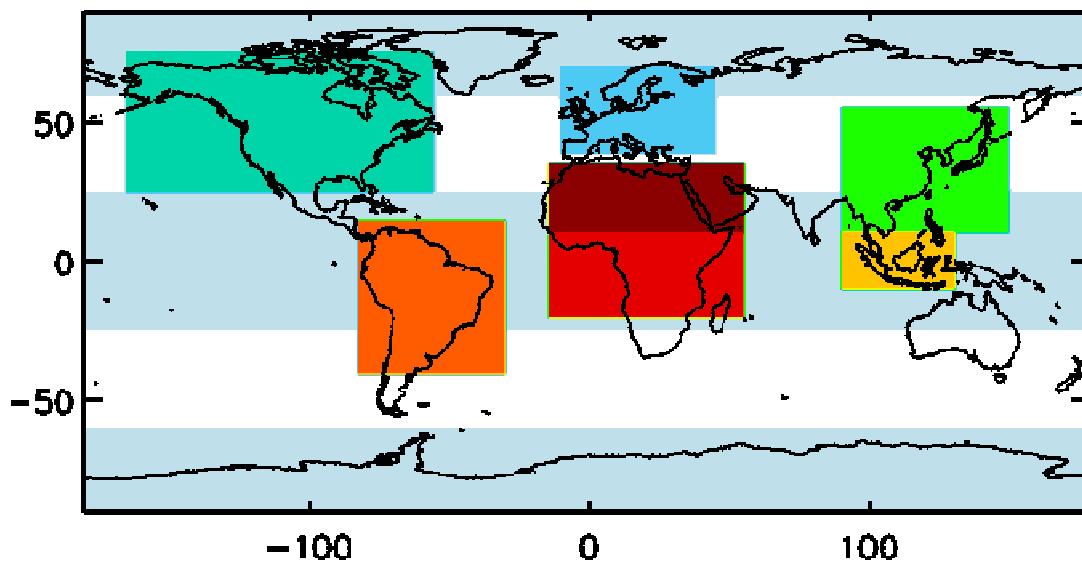

78  
 79 *Figure S1 Area definition for North America (turquoise), Europe (blue), East Asia*  
 80 *(green), South America (orange), Tropical Africa (dark red) and Maritime South East*  
 81 *Asia (yellow) as well as Tropics, Antarctica and the Arctic (all light blue)( see Error!*  
 82 *Reference source not found. of the paper for coordinates).*

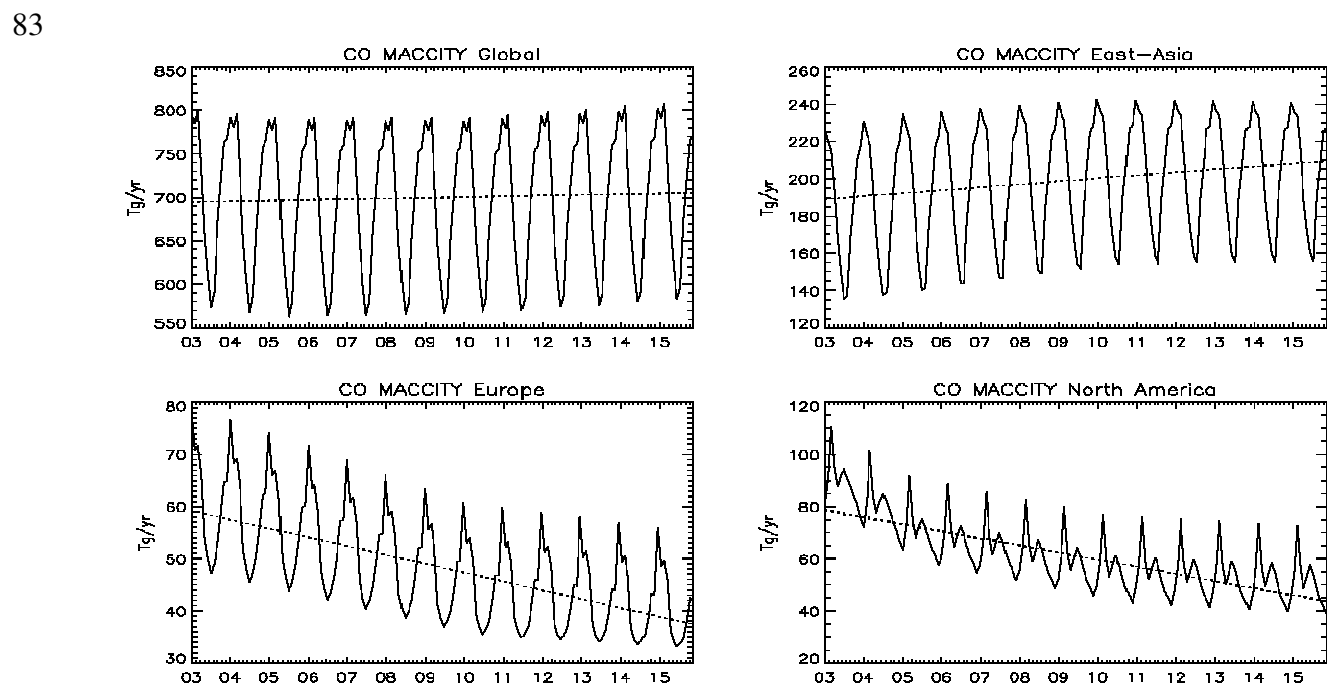

83  
 84  
 85 *Figure S2 Monthly CO emissions from anthropogenic sources (MACCITY) for the whole*  
 86 *globe and main source regions for the period 2003–2015.*

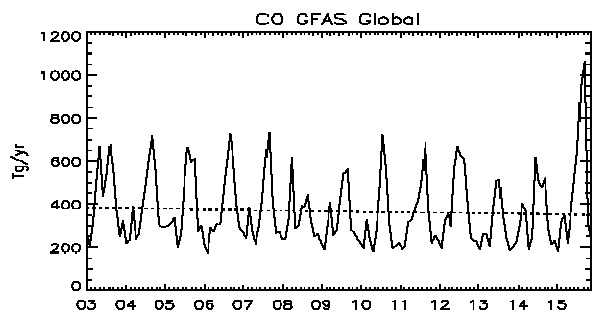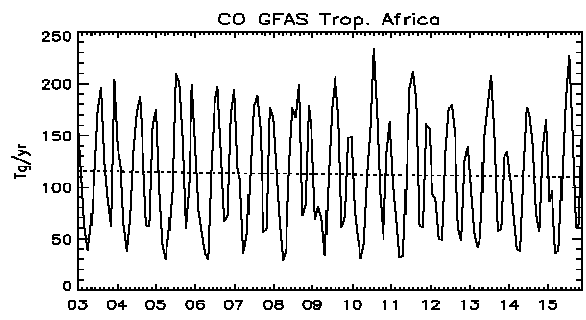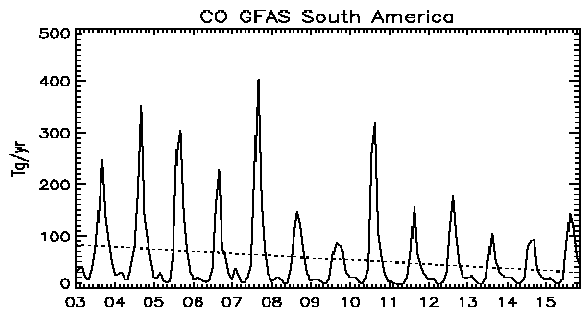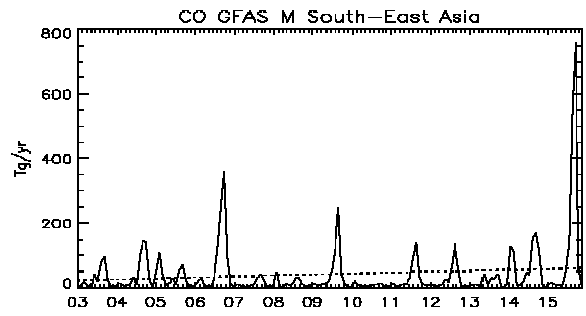

87  
88  
89

*Figure S3 Monthly CO emissions from biomass burning (GFAS) for the whole globe and main source regions for the period 2003–2015.*

90

91

92

93

94



| Species | Area          | Source | Mean (Tg) | Min (Tg) | Year of Min | Max (Tg) | Year of max | Significant (95%) linear trend (%/yr) |
|---------|---------------|--------|-----------|----------|-------------|----------|-------------|---------------------------------------|
| CO      | Global        | BB     | 368.9     | 293.1    | 2013        | 447.5    | 2015        |                                       |
| CO      | Trop. Africa  | BB     | 112.6     | 105.5    | 2014        | 119.7    | 2007        |                                       |
| CO      | South America | BB     | 57.7      | 31.7     | 2013        | 88.4     | 2004        | -7.4                                  |
| CO      | MSE Asia      | BB     | 41.2      | 7.9      | 2010        | 136.2    | 2015        |                                       |
| CO      | tropics       | BB     | 267.4     | 204.4    | 2013        | 347.9    | 2015        |                                       |
| CO      | Global        | A      | 699.9     | 694.8    | 2005        | 710.7    | 2015        | 0.1                                   |
| CO      | East-Asia     | A      | 198.7     | 185.6    | 2003        | 204.3    | 2015        | 0.8                                   |
| CO      | Europe        | A      | 48.9      | 41.2     | 2015        | 60.6     | 2003        | -3.5                                  |
| CO      | North America | A      | 62.2      | 51.2     | 2015        | 89.2     | 2003        | -4.5                                  |
| CO      | tropics       | A      | 316.4     | 301.4    | 2003        | 329.2    | 2015        | 0.7                                   |
| NO      | Global        | A      | 81.5      | 79.6     | 2003        | 84.1     | 2015        | 0.4                                   |
| NO      | East Asia     | A      | 20.7      | 17.0     | 2003        | 23.2     | 2015        | 2.5                                   |
| NO      | Europe        | A      | 10.7      | 9.9      | 2015        | 12.0     | 2003        | -1.7                                  |
| NO      | North America | A      | 13.5      | 11.9     | 2015        | 16.1     | 2003        | -2.5                                  |
| NO      | tropics       | A      | 24.3      | 22.5     | 2003        | 25.9     | 2015        | 1.1                                   |
| C5H8    | Global        | B      | 574.6     | 518.0    | 2008        | 607.8    | 2004        |                                       |
| C5H8    | East-Asia     | B      | 32.6      | 29.7     | 2008        | 38.1     | 2010        |                                       |
| C5H8    | Europe        | B      | 6.8       | 6.2      | 2007        | 8.4      | 2010        |                                       |
| C5H8    | North America | B      | 21.7      | 18.1     | 2009        | 24.5     | 2006        |                                       |
| C5H8    | tropics       | B      | 461.7     | 411.1    | 2008        | 493.3    | 2004        |                                       |
| SS1     | Global        | T      | 32        | 32       | 2003        | 34       | 2010        | 0.5                                   |
| SS2     | Global        | T      | 2711      | 2696     | 2003        | 2883     | 2010        | 0.5                                   |
| SS3     | Global        | T      | 3295      | 3277     | 2003        | 3504     | 2010        | 0.5                                   |
| DD1     | Global        | T      | 114.9     | 113.1    | 2010        | 121.7    | 2015        |                                       |
| DD2     | Global        | T      | 459.5     | 452.2    | 2010        | 486.9    | 2015        |                                       |
| DD3     | Global        | T      | 919.1     | 904.4    | 2010        | 973.8    | 2015        |                                       |
| OM      | Global        | T      | 123.0     | 112.0    | 2013        | 150.3    | 2003        |                                       |
| BC      | Global        | T      | 11.4      | 10.8     | 2009        | 12.9     | 2003        | -0.8                                  |
| ASO2    | Global        | T      | 137.1     | 139.9    | 2003        | 141.4    | 2010        | 0.05                                  |

96  
97  
98  
99

*Table S1 Mean, minimum and maximum annual emissions (Tg), year of extreme and significant (95%) linear trend (%/yr) for different species and regions for the period 2003–2015. Sources categories are A: anthropogenic, BB: biomass burning, T: total, B: biogenic)*
